# Supplementary material
Source: PubMed Central journal article supplement (PMC2757199)
Supplement: supp_M109.033316_Suppdata.pdf [file supp_M109.033316_Suppdata.pdf]

## SUPPLEMENTARY MATERIAL

**Table 1.**

Plasmids and strains used in this study.

| <b>Plasmid</b>                    | <b>Relevant genotype, features, markers</b>                           | <b>Reference / construction</b> |
|-----------------------------------|-----------------------------------------------------------------------|---------------------------------|
| pQE30-YtvA                        | pQE30 <i>Pspac::ytvA</i> , Amp                                        | This study                      |
| pDG148- <i>Stu</i>                | pDG148- <i>Stu</i> , Km                                               | Bacillus Genetic Stock Center   |
| pYtvA                             | pDG148- <i>Stu Pspac::ytvA</i> , Km                                   | Avila-Perez <i>et al</i> , 2006 |
| pYtvA-Y52F                        | pDG148- <i>Stu Pspac::ytvA-Y52F</i> , Km                              | This study                      |
| pYtvA-E56Q                        | pDG148- <i>Stu Pspac::ytvA-E56Q</i> , Km                              | This study                      |
| pYtvA-C62S                        | pDG148- <i>Stu Pspac::ytvA-C62S</i> , Km                              | This study                      |
| pYtvA-E105L                       | pDG148- <i>Stu Pspac::ytvA-E105L</i> , Km                             | This study                      |
| pYtvA-D109L                       | pDG148- <i>Stu Pspac::ytvA-D109L</i> , Km                             | This study                      |
| pYtvA-Q123A                       | pDG148- <i>Stu Pspac::ytvA-Q123A</i> , Km                             | This study                      |
| pYtvA-Q123N                       | pDG148- <i>Stu Pspac::ytvA-Q123N</i> , Km                             | This study                      |
| pYtvA-T167A                       | pDG148- <i>Stu Pspac::ytvA-T167A</i> , Km                             | This study                      |
| pYtvA-T167D                       | pDG148- <i>Stu Pspac::ytvA-T167D</i> , Km                             | This study                      |
| pYtvA-E168A                       | pDG148- <i>Stu Pspac::ytvA-E168A</i> , Km                             | This study                      |
| pYtvA-D193N                       | pDG148- <i>Stu Pspac::ytvA-D193N</i> , Km                             | This study                      |
| pYtvA-S195A                       | pDG148- <i>Stu Pspac::ytvA-S195A</i> , Km                             | This study                      |
| pYtvA-S195D                       | pDG148- <i>Stu Pspac::ytvA-S195D</i> , Km                             | This study                      |
| pYtvA-E202A                       | pDG148- <i>Stu Pspac::ytvA-E202A</i> , Km                             | This study                      |
| pYtvA-T204A                       | pDG148- <i>Stu Pspac::ytvA-T204A</i> , Km                             | This study                      |
| <b><i>B. subtilis</i> strains</b> |                                                                       |                                 |
| PB565                             | <i>ytvAΔI::ery amyE::Pctc-lacZ Cm trpC2</i> host strain               | Akbar <i>et al</i> 2001         |
| PB565 pDG148- <i>stu</i>          | <i>ytvAΔI::ery amyE::Pctc-lacZ Cm trpC2</i> , pDG148- <i>Stu</i> , Km | This study                      |
| PB565 pYtvA                       | <i>ytvAΔI::ery amyE::Pctc-lacZ Cm trpC2</i> , pYtvA, Km               | This study                      |
| PB565 pYtvA-Y52F                  | <i>ytvAΔI::ery amyE::Pctc-lacZ Cm trpC2</i> , pYtvA-Y52F, Km          | This study                      |
| PB565 pYtvA-E56Q                  | <i>ytvAΔI::ery amyE::Pctc-lacZ Cm trpC2</i> , pYtvA-E56Q, Km          | This study                      |
| PB565 pYtvA-C62S                  | <i>ytvAΔI::ery amyE::Pctc-lacZ Cm trpC2</i> , pYtvA-C62S, Km          | This study                      |
| PB565 pYtvA-E105L                 | <i>ytvAΔI::ery amyE::Pctc-lacZ Cm trpC2</i> , pYtvA-E105L, Km         | This study                      |
| PB565 pYtvA-D109L                 | <i>ytvAΔI::ery amyE::Pctc-lacZ Cm trpC2</i> , pYtvA-D109L, Km         | This study                      |
| PB565 pYtvA-Q123A                 | <i>ytvAΔI::ery amyE::Pctc-lacZ Cm trpC2</i> , pYtvA-Q123A, Km         | This study                      |
| PB565 pYtvA-Q123N                 | <i>ytvAΔI::ery amyE::Pctc-lacZ Cm trpC2</i> , pYtvA-Q123N, Km         | This study                      |
| PB565 pYtvA-T167A                 | <i>ytvAΔI::ery amyE::Pctc-lacZ Cm trpC2</i> , pYtvA-T167A, Km         | This study                      |
| PB565 pYtvA-T167D                 | <i>ytvAΔI::ery amyE::Pctc-lacZ Cm trpC2</i> , pYtvA-T167D, Km         | This study                      |
| PB565 pYtvA-E168A                 | <i>ytvAΔI::ery amyE::Pctc-lacZ Cm trpC2</i> , pYtvA-E168A, Km         | This study                      |
| PB565 pYtvA-D193N                 | <i>ytvAΔI::ery amyE::Pctc-lacZ Cm trpC2</i> , pYtvA-D193N, Km         | This study                      |
| PB565 pYtvA-S195A                 | <i>ytvAΔI::ery amyE::Pctc-lacZ Cm trpC2</i> , pYtvA-S195A, Km         | This study                      |
| PB565 pYtvA-S195D                 | <i>ytvAΔI::ery amyE::Pctc-lacZ Cm trpC2</i> , pYtvA-S195D, Km         | This study                      |
| PB565 pYtvA-E202A                 | <i>ytvAΔI::ery amyE::Pctc-lacZ Cm trpC2</i> , pYtvA-E202A, Km         | This study                      |
| PB565 pYtvA-T204A                 | <i>ytvAΔI::ery amyE::Pctc-lacZ Cm trpC2</i> , pYtvA-T204A, Km         | This study                      |
| PB565 pYtvA-T204D                 | <i>ytvAΔI::ery amyE::Pctc-lacZ Cm trpC2</i> , pYtvA-T204D, Km         | This study                      |

**Primers:**

**Y52F**

FW: 5' – CTT TGT TCA AAT GAC CGG CTT CGA GAC CGA GGA AAT TTT AG – 3'

RV: 5' – CTA AAA TTT CCT CGG TCT CGA AGC CGG TCA TTT GAA CAA AG – 3'

**E56Q**

FW: 5' – CAA ATG ACC GGC TAC GAG ACC GAG CAA ATT TTA GGA AAG AAC TGT CGC – 3'

RV: 5' – GAG ACA GTT CTT TCC TAA AAT TTG CTC GGT CTC GTA GCC GGT CAT TTG – 3'

**C62S**

FW: 5' – GAG GAA ATT TTA GGA AAG AAC AGT CGC TTC TTA CAG GGG AAA C – 3'

RV: 5' – GTT TCC CCT GTA AGA AGC GAC TGT TCT TTC CTA AAA TTT CCT C – 3'

**E105L**

FW: 5' – GGA ACG ATG TTC TGG AAT CTA TTA AAT ATT GAT CCA ATG GAA ATA GAG – 3'

RV: 5' – CTC TAT TTC CAT TGG ATC AAT ATT TAA TAG ATT CCA GAA CAT CGT TCC – 3'

**D109L**

FW: 5' – TGG AAT GAA TTA AAT ATT CTT CCA ATG GAA ATA GAG GAT AAA ACG – 3'

RV: 5' – CGT TTT ATC CTC TAT TTC CAT TGG AAG AAT ATT TAA TTC ATT CCA – 3'

**Q123A**

FW: 5' – CGT ATT TTG TCG GAA TTG CGA ATG ATA TCA CCA AGC – 3'

RV: 5' – GCT TGG TGA TAT CAT TCG CAA TTC CGA CAA AAT ACG – 3'

**Q123N**

FW: 5' – CGT ATT TTG TCG GAA TTA ATA ATG ATA TCA CCA AGC – 3'

RV: 5' – CGT ATT TTG TCG GAA TTA ATA ATG ATA TCA CCA AGC – 3'

**T167A**

FW: 5' – CCG CTA GTC GGA AAC CTG GCA GAG GAG CGA TTT AAT TC – 3'

RV: 5' – GAA TTA AAT CGC TCC TCT GCC AGG TTT CCG ACT AGC GG – 3'

**T167D**

FW: 5' – CTT CCG CTA GTC GGA AAC CTG GAT GAG GAG CGA TTT AAT TCC AC – 3'

RV: 5' – GTG GAA TTA AAT CGC TCC TCA TCC AGG TTT CCG ACT AGC GGA AG – 3'

**E168A**

FW: 5' – GCT AGT CGG AAA CCT GAC AGC AGA GCG ATT TAA TTC CAC TG – 3'

RV: 5' – CAG TGG AAT TAA ATC GCT CTG CTG TCA GGT TTC CGA CTA GC – 3'

**D193N**

FW: 5' – GAT GAT TAT TTG ATC ATT AAT TTA TCC GGA TTG GCC C – 3'

RV: 5' – GGG CCA ATC CGG ATA AAT TAA TGA TCA AAT AAT CAT C – 3'

**S195A**

FW: 5' – GAT TAT TTG ATC ATT GAT TTA GCC GGA TTG GCC CAA GTG AAC G – 3'

RV: 5' – CGT TCA CTT GGG CCA ATC CGG CTA AAT CAA TGA TCA AAT AAT C – 3'

**S195D**

FW: 5' – GAT CAT TGA TTT AGA CGG ATT GGC CCA AG – 3'

RV: 5' – CTT GGGCCA ATC CGT CTA AAT CAA TGA TC – 3'

**E202A**

FW: 5' – GCC CAA GTG AAC GCA CAA ACG GCC GAC C – 3'

RV: 5' – GGT CGG CCG TTT GTG CGT TCA CTT GGG C – 3'

**T204A**

FW: 5' – GCC CAA GTG AAC GAA CAA GCG GCC GAC CAA ATT TTC – 3'

RV: 5' – GAA AAT TTG GTC GGC CGC TTG TTC GTT CAC TTG GGC – 3'

**T204D**

FW: 5' – GGC CCA AGT GAA CGA ACA AGA CGC CGA CCA AAT TTT CAA GC – 3'

RV: 5' – GCT TGA AAA TTT GGT CGG CGT CTT GTT CGT TCA CTT GGG CC – 3'

**pQE30YtvA**

FW: 5' – GGG GTC GAC TTA CAT AAT CGG AAG CAC TTT AAC G – 3'

RV: 5' – CCC GGA TCC ATG GCT AGT TTT CAA TCA TTT GGG – 3'

**Figure 1.** Alignment of YtvA<sub>148-261</sub> and *MtRsbS*<sub>6-123</sub> (PBD 2VY9) chain A.

```
2VY9A      - PILKVDD-YWVVAI EETLHDQSVI QFKEELLHNI TGVAGKGLV IDISALEVVDSFVTRV 63
YtvA       TPIVP IRNGI SALPL VGNLT EERFNS I VCTLTN I LSTSKDDYLI IDLSGLAQVNEQTADQ 206
           ** : : : . : : . * : : . : * : : : . . * : * : * . * * : . :

2VY9A      L I E I S R L A E L L G L P F V L T G I K P A V A I T L T E X G L D L R G X A T A L N L Q K G L D K L K N L   A R X E Q R   123
YtvA       I F K L S H L L K L T G T E L I I T G I K P E L A M K M N K L D A N F S S L K T Y S N V K D A V K V L P I M ----- 261
           : : : * : * : * * : : * * * * : * : : : . : : . * * : : : . * : :
```

**Figure 2.** Alignment of YtvA, RsbS and RsbR paralogs. Underline residues are conserved Threonines. Bold residues negative charges residues.

```
YkoB      EPGEKQKWADLIVKVFDFTIYTFVDHAEMNAKQQLNAQREMILELSSPVITLSKSTALLP 179
Yo jH     KSEEAEDLYHALIKAFDLVIHIFIEEMYKNTSLQLQAQKDMITELSAPVIVLFHVSGLLP 179
YqhA      SIQEFYEWRSRILNQNIIDEIIEVFTEEYHQVTMIQLNAQKEMINELSAPIMPITDGIGILP 174
RsbR      PDQESTELIWQIDRFFSPINTEIFNQYSISWEKTVSLQKIALQELSAPLIPVFENITVMP 164
RsbS      -----MRHPKIPILKLYN-CLLVS 18
YtvA      EIEDKTYFVGIQNDITK-----QKEYEKLEDSLTEITALSTPIVPIRNGISALP 161
           : . * : : . : .

YkoB      LVGDIDTERAKFILENTLQACAKRRVEHLLIDLSGVVVDTMVAHQIFKLI EALNLIGVR 239
Yo jH     LIGDIDTVRAKLIMENTLHQCAKKKVTQLYIDLSGVAVIDTMVAHQFLSLIEALRLIGVS 239
YqhA      LVGEIDTHRARTILES VLEQCSALKLSYLFLDISGVP IVDTMVAYQIFKVIDSTKLLGIE 234
RsbR      LVGTIDTERAKRIMENLLNGVVKHRSQVVLIDITGVPVVDTMVAHHIIQASEAVRLVGAK 224
RsbS      IQWELDDQTALTFQEDLLNKIYETGANGVVIDLTSVDMIDSFIAKVLGDVITMSKLMGAK 78
YtvA      LVGNLTEERFNSIVCTLTN I LSTSKDDYLI IDLSGLAQVNEEQTADQIFKLSHLLKLTGTE 221
           : : : : : : : * : . . * *

YkoB      STLSGIRPEIAQTAVQLGIDFSNITIKTNLAQALNYHQ----- 277
Yo jH     STLSGIRPEIAQTAVQLGLSFEGISLRSTLASAIASDLKLV----- 282
YqhA      TIISGIRPEIAQTVVKLGLDFSNVKTEQSLAKALANKGFKIKEC----- 278
RsbR      CLLAGIRPEIAQTIVNLGIDLSQVITKNTLQKGIQTALEMTDRKIVSLGE 274
RsbS      VVLTGIQPAVAVTLIELGIALEEIETALDLEQGLET LKRELGE----- 121
YtvA      LIITGIKPELAMKMNKLDANFSSLKTYSNVKDAVKVLPIM----- 261
           : * : * : * . : * . : : : : : . .
```
